# Supplementary material for: Are Antibiotics Prescribed to Inpatients According to Recommended Standard Guidelines in Juba Teaching Hospital, South Sudan? A Retrospective Cross-sectional Study
Source: Research Square preprint supplement (doi:10.21203/rs.3.rs-401614/v1), 2021-04-08
Supplement: Supplementary file 1 [file a5106a1d661fcf6f65bc5afb.docx]

**Appendices**

**Appendix A: Sample Allocation and Distribution of Inpatients by Ward at Juba Teaching Hospital (2016)**

| Medical Ward | | | | Surgical Ward | | | |
| --- | --- | --- | --- | --- | --- | --- | --- |
| **Month** | **Admission** | **Proportion** | **Sample size** | **Month** | **Admission** | **Proportion** | **Sample size** |
| Jan | * |  |  | Jan | * |  |  |
| Feb | 10,541 | 34% | 112 | Feb | 1,293 | 14% | 14 |
| Mar | 3,214 | 10% | 34 | Mar | 2,376 | 25% | 25 |
| Apr | 2,375 | 8% | 25 | Apr | 931 | 10% | 10 |
| May | 1,050 | 3% | 11 | May | 240 | 3% | 3 |
| Jun | 3,176 | 10% | 34 | Jun | 1,517 | 16% | 16 |
| Jul | 1,274 | 4% | 14 | Jul | 179 | 2% | 2 |
| Aug | 2,349 | 8% | 25 | Aug | 454 | 5% | 5 |
| Sep | 1,193 | 4% | 13 | Sep | 243 | 3% | 3 |
| Oct | 1,906 | 6% | 20 | Oct | 693 | 7% | 7 |
| Nov | 778 | 3% | 8 | Nov | 184 | 2% | 2 |
| Dec | 3,061 | 10% | 32 | Dec | 1,224 | 13% | 13 |
| **Total** | **30,917** | **100%** | **328** |  | **9,334** | **100%** | **100** |

*Note:* ******* *No records available for this month*

**Appendix B: Criteria Proposed by Baktygul et al. 2011** [18]


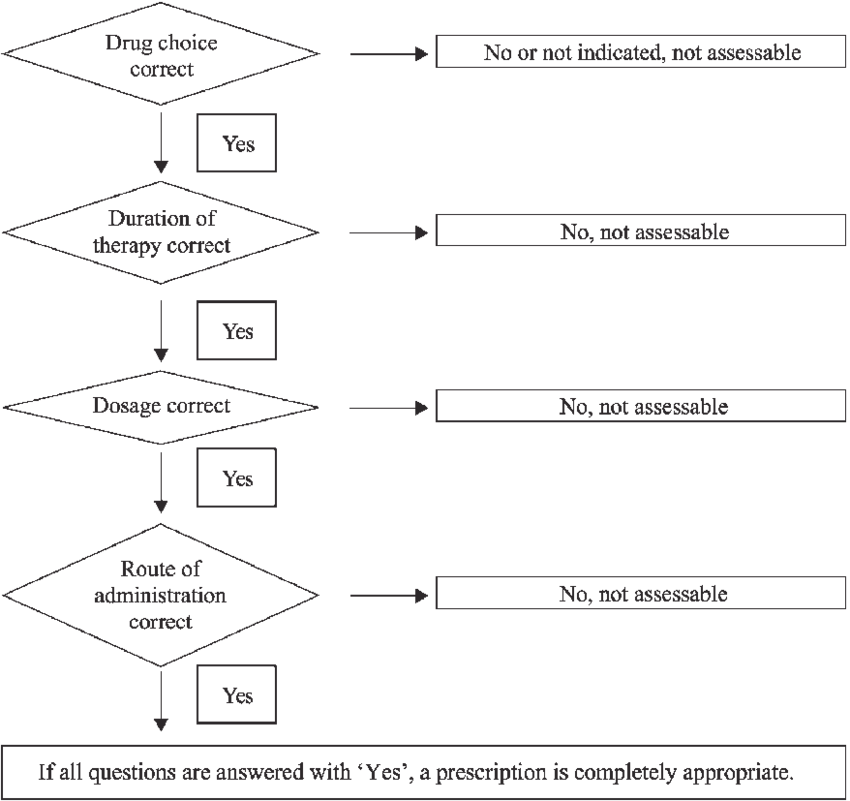


**Appendix C: Data Collection Form**

|  | **Antibiotic Use at Juba Teaching Hospital** | | | | | |  | |  | | |
| --- | --- | --- | --- | --- | --- | --- | --- | --- | --- | --- | --- |
|  | |  | **Section A: Identification Information** | | | | |  | |  |  |
| A. Name of data collector:___________________ | | | | | | B. Code No.:_____________ | | | | | |
| C. Form unique number:___________ | | | | | D. Date of data collection: ___/___/20___ | | | | | | |
|  | |  | **Section B: Demographic and Clinical Information** | | | | | | |  |  |
| Q No. | | Questions and filters | | | Coding categories | | |  | | Skips |  |
| 101 | | Age |  |  | 0–5 years ………………..1 | | | | |  |  |
|  | |  |  |  | 6–17 years ………………2 | | | | |  |  |
|  | |  |  |  | ≥18 years …………………3 | | | | |  |  |
| 102 | | Sex |  |  | Male ………………………..1 | | | | |  |  |
|  | |  |  |  | Female …………………….2 | | | | |  |  |
| 103 | | Occupation | |  | Businessman …………..1 | | | | |  |  |
|  | |  |  |  | Teacher …………………...2 | | | | |  |  |
| 104 | | Diagnosis | |  | Respiratory tract disease……….........1 | | | | |  |  |
|  | |  |  |  | Genitourinary tract disease……........2 | | | | |  |  |
|  | |  |  |  | Gastrointestinal tract disease..........3 | | | | |  |  |
|  | |  |  |  | Pregnancy & childbirth illness……….4 | | | | |  |  |
|  | |  |  |  | Consequence of external cause…....5 | | | | |  |  |
|  | |  |  |  | Circulatory system disease…............6 | | | | |  |  |
|  | |  |  |  | Infectious & parasitic disease….......7 | | | | |  |  |
|  | |  |  |  | Others…………………………...........8 | | | | |  |  |
| 105 | | Length of hospital stay | | | 0–7 days.......1 | | | | |  |  |
|  | |  |  |  | 8–14 days......2 | | | | |  |  |
|  | |  |  |  | ≥15 days.........3 | | | | |  |  |
| 106 | | Ward |  |  | Medical …………………..1 | | | | |  |  |
|  | |  |  |  | Surgical …………………..2 | | | | |  |  |

|  |  | **Section C: Antibiotic Prescription Pattern** | | |
| --- | --- | --- | --- | --- |
| 201 | Antibiotic(s) prescribed *(Please state medicine name as indicated in the patient file)* | | | Metronidazole ……….. A =  Ampicillin ………………. B = 2 |
| 202 | Number of antibiotic(s) | | | One …………………………1 |
|  | prescribed | |  | Two …………………………2 |
|  |  |  |  | Three ………………………3 |
|  |  |  |  | Four ………………………..4 |
|  |  |  |  | Five …………………………5 |
| 203 | Dosage method | | | Tablet ……………………..1 |
|  |  |  |  | Capsule …………………..2 |
|  |  |  |  | Injection soln ………....3 |
|  |  |  |  | Susp/ syrup ……………..4 |
|  |  |  |  | Ointment ………….…….5 |
|  |  |  |  | Other ………………………6 |
| 204 | Duration of therapy | | | 0–7 days …………………1 |
|  |  |  |  | 8–14 days ……………….2 |
|  |  |  |  | ≥15 days …………………3 |
| 205 | Route of administration | | | Oral ………………………..1 |
|  |  | | | Intramuscular …………2 |
|  |  | | | Intravenous ……………3 |
|  |  | | | Intra-bone ………………4 |
|  |  | | | Topical ……………………5 |
|  |  | | | Other ……………………..6 |
|  |  | **Section D: Quality Assessment for Antibiotic Use** | | |
| 301 | Drug choice correct: | | | Yes …………………………..1 |
|  |  | | | No ……………………………2 |
| 302 | Duration of therapy correct: | | | Yes ………………………….1 |
|  |  | | | No …………………………..2 |
| 303 | Given dosage correct: | | | Yes …………………………..1 |
|  |  | | | No ……………………………2 |
| 304 | Correct route of administration: | | | Yes …………………………..1 |
|  |  | | | No ……………………………2 |

|  |  | **Section E: Appropriateness of Antibiotics Use** | | | |
| --- | --- | --- | --- | --- | --- |
| 401 | The prescribed antibiotic(s) are: | | Appropriately used ………...1 | | |
|  |  | | Not appropriately used…….2 | | |
| 402 | Antibiotics are indicated for treatment according to national guidelines: | | Yes ………………………….1 | | |
|  | No …………………………..2 | | |
|  |  |  |  |
